# Supplementary material for: Why do polyarginines adsorb at neutral phospholipid bilayers and polylysines do not? An insight from density functional theory calculations and molecular dynamics simulations
Source: Royal Society of Chemistry journal article supplement (doi:10.1039/d3cp02411c), 2023-01-01
Supplement: d3cp02411c1.pdf [file d3cp02411c1.pdf]

## **Why do Polyarginines Adsorb at Neutral Phospholipid Bilayers and Polylysines do not? An Insight from Density Functional Calculations and Molecular Dynamics Simulations**

Carmelo Tempra,<sup>1</sup> Zlatko Brkljača,<sup>2,a</sup> Mario Vazdar<sup>3,\*</sup>

---

<sup>a)</sup> Present address: Selvita d.o.o. Prilaz baruna Filipovića 29, 10000 Zagreb, Croatia.

<sup>1</sup>Institute of Organic Chemistry and Biochemistry of the Czech Academy of Sciences, Flemingovo náměstí 542/2, 16000 Prague, Czech Republic

<sup>2</sup>Division of Organic Chemistry and Biochemistry, Ruđer Bošković Institute, Bijenička 54, 10000 Zagreb, Croatia

<sup>3</sup>Department of Mathematics, Informatics and Cybernetics, University of Chemistry and Technology, Technická 5, 16628 Prague, Czech Republic

Corresponding author e-mail: [mario.vazdar@vscht.cz](mailto:mario.vazdar@vscht.cz)

### **Supplementary Information**

Page 2. Partial charges of charged groups described with ProsECCo force field used in peptide/bilayer MD simulations.

**Table S1:** The partial charges in the ProsECCo force field of charged groups in POPC, POPE lipids, R<sub>9</sub>, K<sub>9</sub> peptides, and Cl<sup>-</sup> counterion.

|                 | POPC lipid                        |         | POPE lipid                        |                              |                  | R <sub>9</sub> /K <sub>9</sub> peptide |                                                | ions            |
|-----------------|-----------------------------------|---------|-----------------------------------|------------------------------|------------------|----------------------------------------|------------------------------------------------|-----------------|
| Scaled groups   | 2O(PO <sub>4</sub> <sup>-</sup> ) | choline | 2O(PO <sub>4</sub> <sup>-</sup> ) | NH <sub>3</sub> <sup>+</sup> | -NH <sub>2</sub> | -COO <sup>-</sup>                      | Gdm <sup>+</sup> /NH <sub>3</sub> <sup>+</sup> | Cl <sup>-</sup> |
| Partial charges | -0.655                            | +0.75   | -0.655                            | +0.75                        | +0.75            | -0.75                                  | +0.75                                          | -0.75           |
